# Supplementary material
Source: PubMed Central journal article supplement (PMC5157694)
Supplement: NIHMS803086-supplement-Supporting_Information.pdf [file NIHMS803086-supplement-Supporting_Information.pdf]

## Supporting Information

### The effect of RGD peptide on 2D and miniaturized 3D culture of HEPM cells, MSCs, and ADSCs with alginate hydrogel

*Jenna Dumbleton, Pranay Agarwal, Haishui Huang, Nathaniel Hoglebe, Keith J. Gooch, and Xiaoming He\**

**Figure S1.** A schematic illustration of the microfluidic device used for producing the cell-laden core-shell microcapsules with the inset showing the design of the flow-focusing junction. After the core solution containing cells, shell solution containing sodium alginate, and mineral oil emulsified with aqueous solution of calcium chloride flow into the flow-focusing junction, the oil emulsion shears the core and shell solutions to generate core-shell structured droplets at the flow-focusing junction. The alginate solution in the droplets is cross-linked by  $\text{Ca}^{2+}$  in the oil emulsion into hydrogel at and after the flow-focusing junction. The extraction channel at the end of the microfluidic device helps to extract/transfer the microcapsules from the oil to aqueous solution of carboxymethyl cellulose for efficient collection of the cell-laden core-shell microcapsules. The oil channel was  $400\ \mu\text{m} \times 400\ \mu\text{m}$ , the shell channel was  $300\ \mu\text{m} \times 300\ \mu\text{m}$ , and the core channel was  $200\ \mu\text{m} \times 200\ \mu\text{m}$ .<sup>44</sup>

**Figure S2.** Schematic designs showing how mechanical properties including storage ( $G'$ ) and loss ( $G''$ ) moduli were measured using rheometry. (A) Alginate solution was pipetted onto a circular PDMS mold, then cross-linked with  $\text{CaCl}_2$ . The gel disk was then transferred to the parallel-plate platform of the rheometer. (B) The core solution, which was 2% carboxymethyl cellulose, was pipetted directly onto the cone-plate platform for measurements.

**Figure S3.** Human embryonic palatal mesenchyme (HEPM) cells, mesenchymal stem cells (MSCs), and adipose derived stem cells (ADSCs) cultured on flat hydrogels of 0.5% alginate-RGD, 2% alginate-RGD, and 2% unmodified alginate on days 0 and 4. The initial cell density was  $5 \times 10^4$  cells per well. Scale bar is  $100\ \mu\text{m}$ .

**Figure S4.** Typical images showing the morphology of HEPM cells cultured in the core of microcapsules with an alginate or alginate-RGD shell on days 0 and 4. Three different cores were studied: liquid core (0% alginate-RGD), hydrogel core of 0.5% alginate-RGD, and hydrogel core of 2% alginate-RGD. Scale bar is 100  $\mu\text{m}$ .

**Figure S5.** Typical images showing the morphology of MSCs cultured in the core of microcapsules with an alginate or alginate-RGD shell on days 0 and 4. Three different cores were studied: liquid core (0% alginate-RGD), hydrogel core of 0.5% alginate-RGD, and hydrogel core of 2% alginate-RGD. Scale bar is 100  $\mu\text{m}$ .

**Figure S6.** Typical images showing the morphology of ADSCs cultured in the core of microcapsules with an alginate or alginate-RGD shell on days 0 and 4. Three different cores were studied: liquid core (0% alginate-RGD), hydrogel core of 0.5% alginate-RGD, and hydrogel core of 2% alginate-RGD. Scale bar is 100  $\mu\text{m}$ .

**Figure S7.** Human embryonic palatal mesenchyme (HEPM) cells, mesenchymal stem cells (MSCs), and adipose derived stem cells (ADSCs) cultured on flat hydrogels of 0.5% alginate-RGD, 2% alginate-RGD, and 2% unmodified alginate on days 6 with live/dead staining showing viability of all cells whether spread on the alginate-RGD hydrogels or aggregated on the alginate hydrogels. Scale bar is 100  $\mu\text{m}$ .

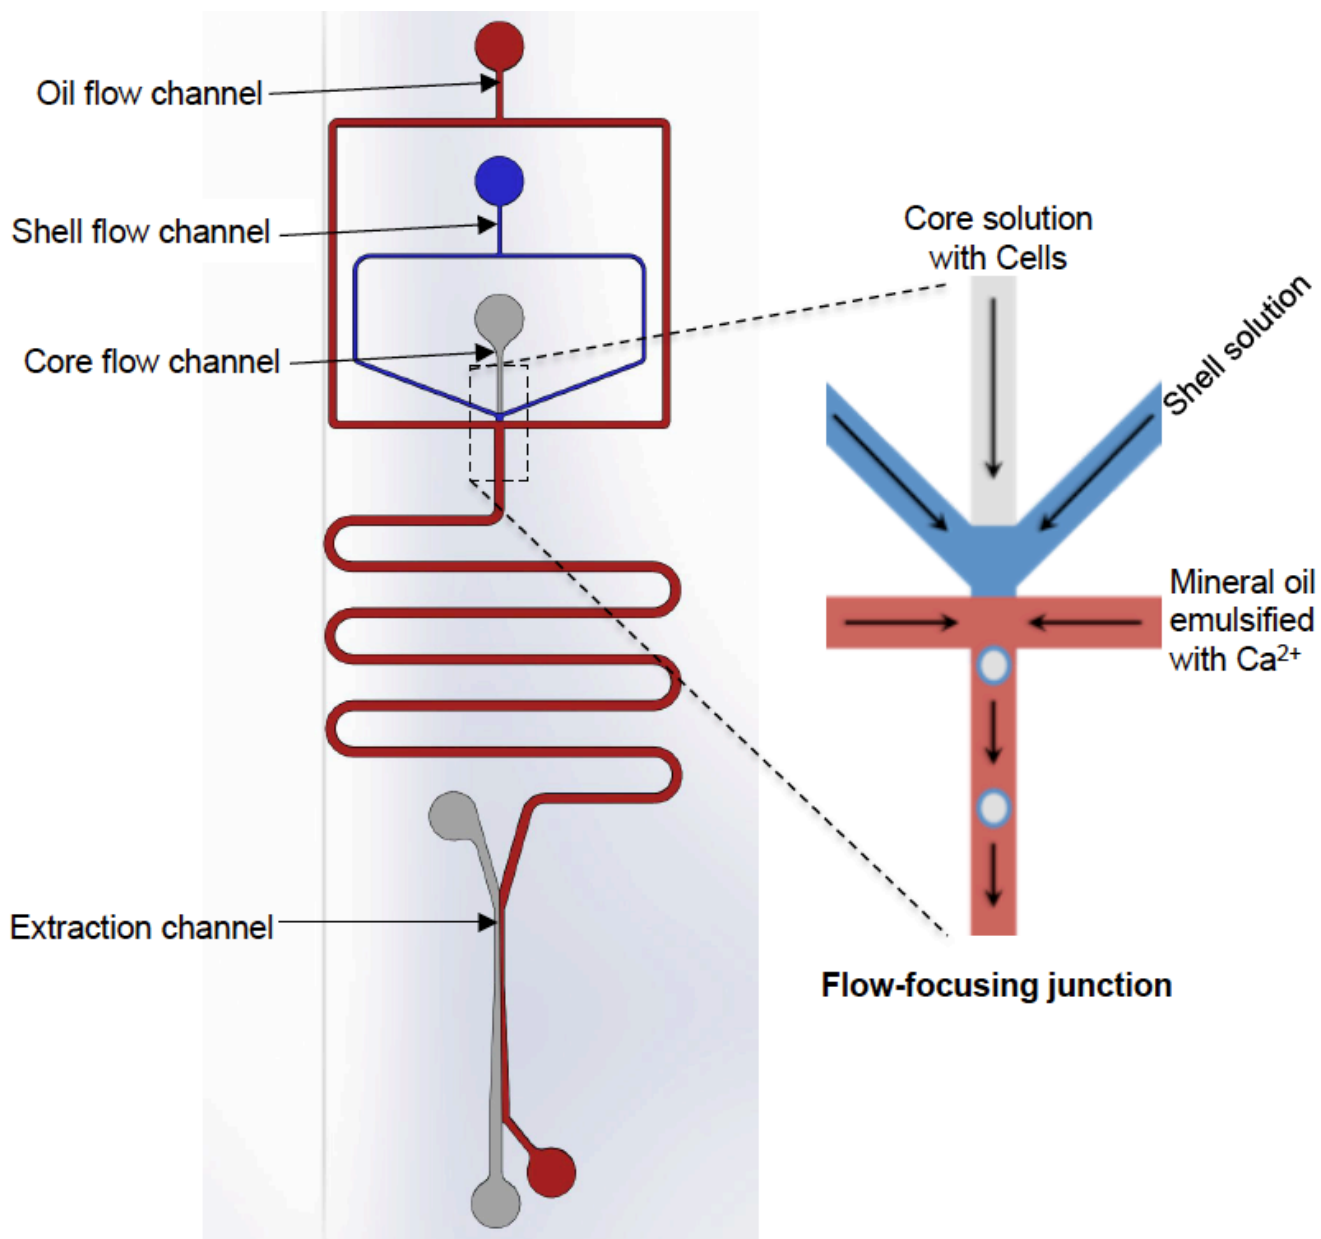

Dumbleton\_Figure S1

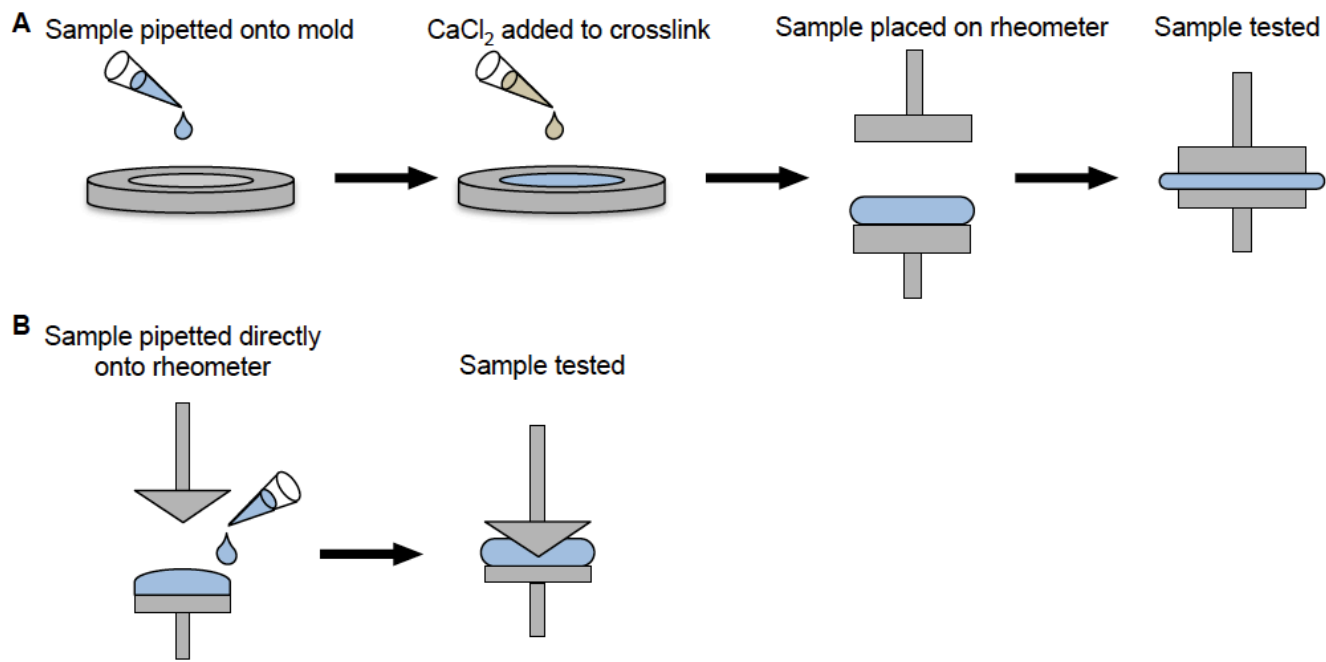

**Dumbleton\_Figure S2**

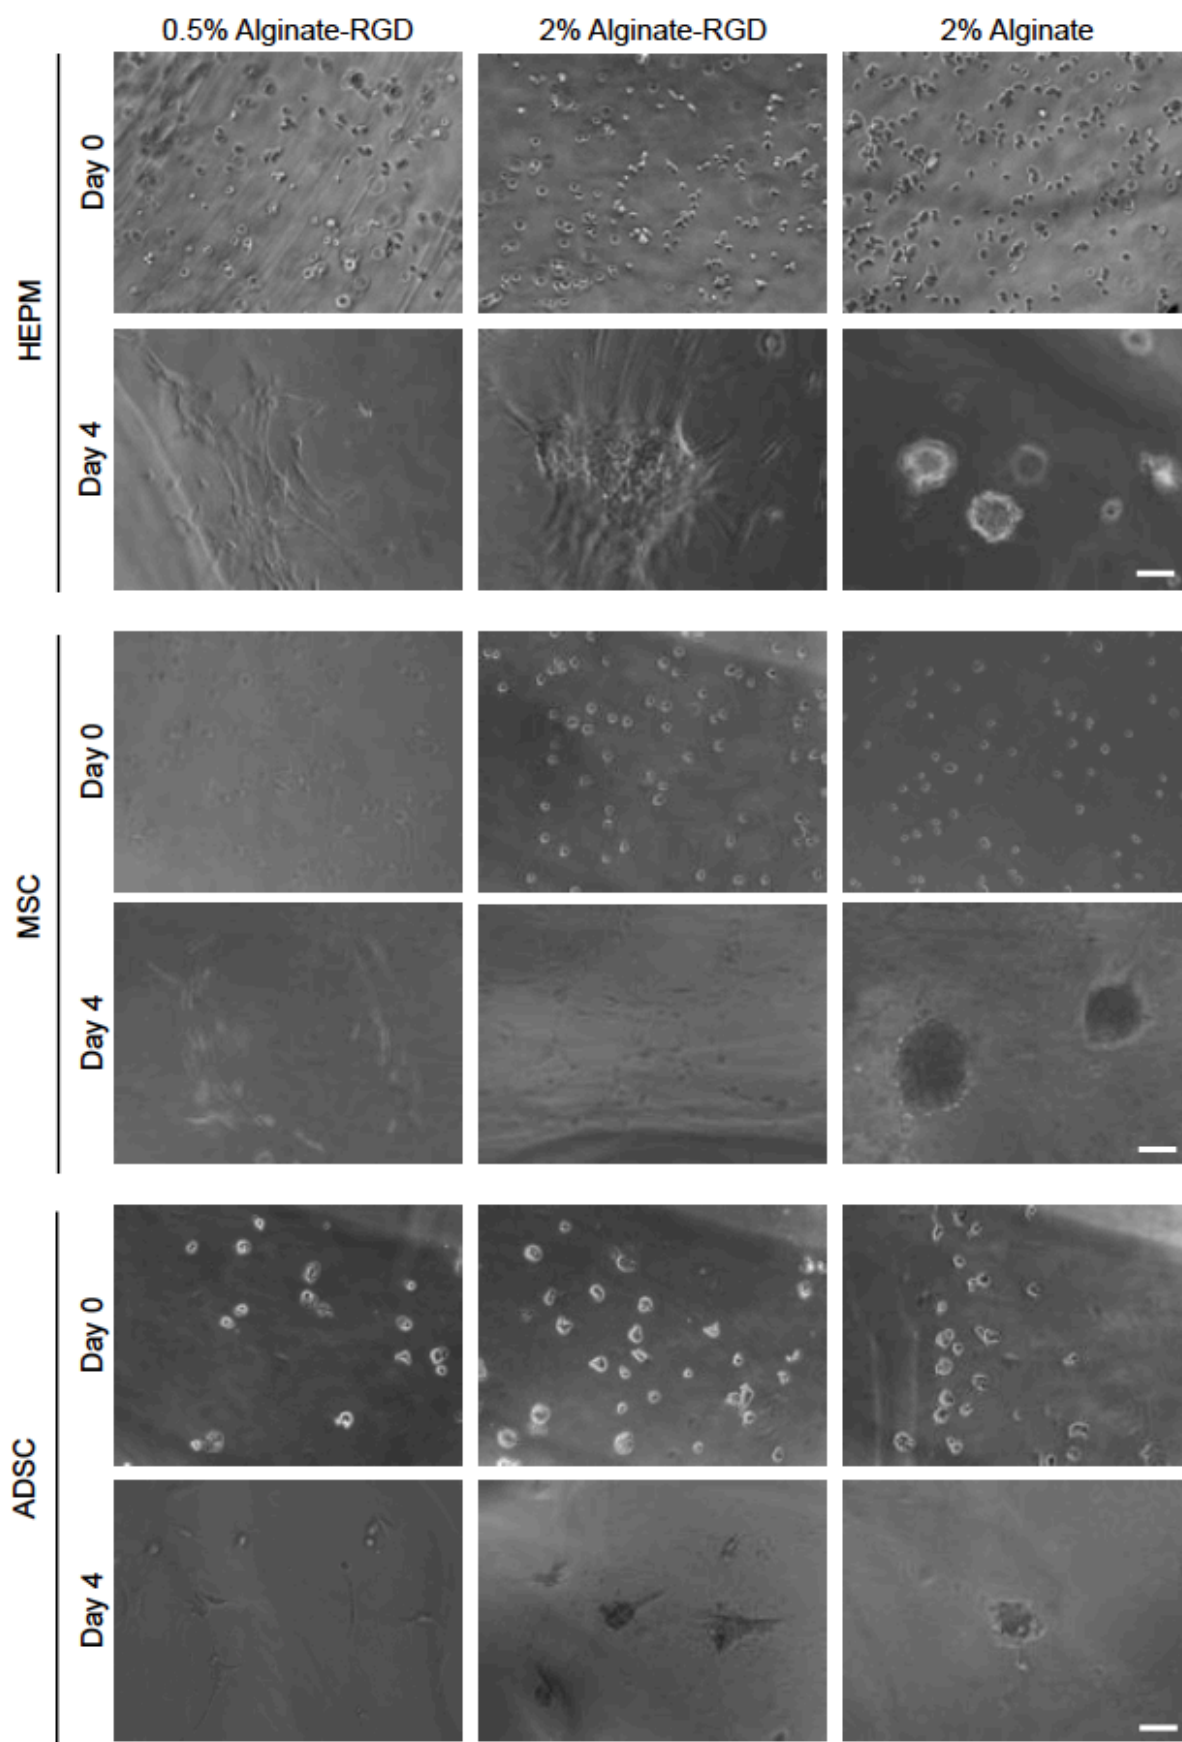

Dumbleton\_Figure S3

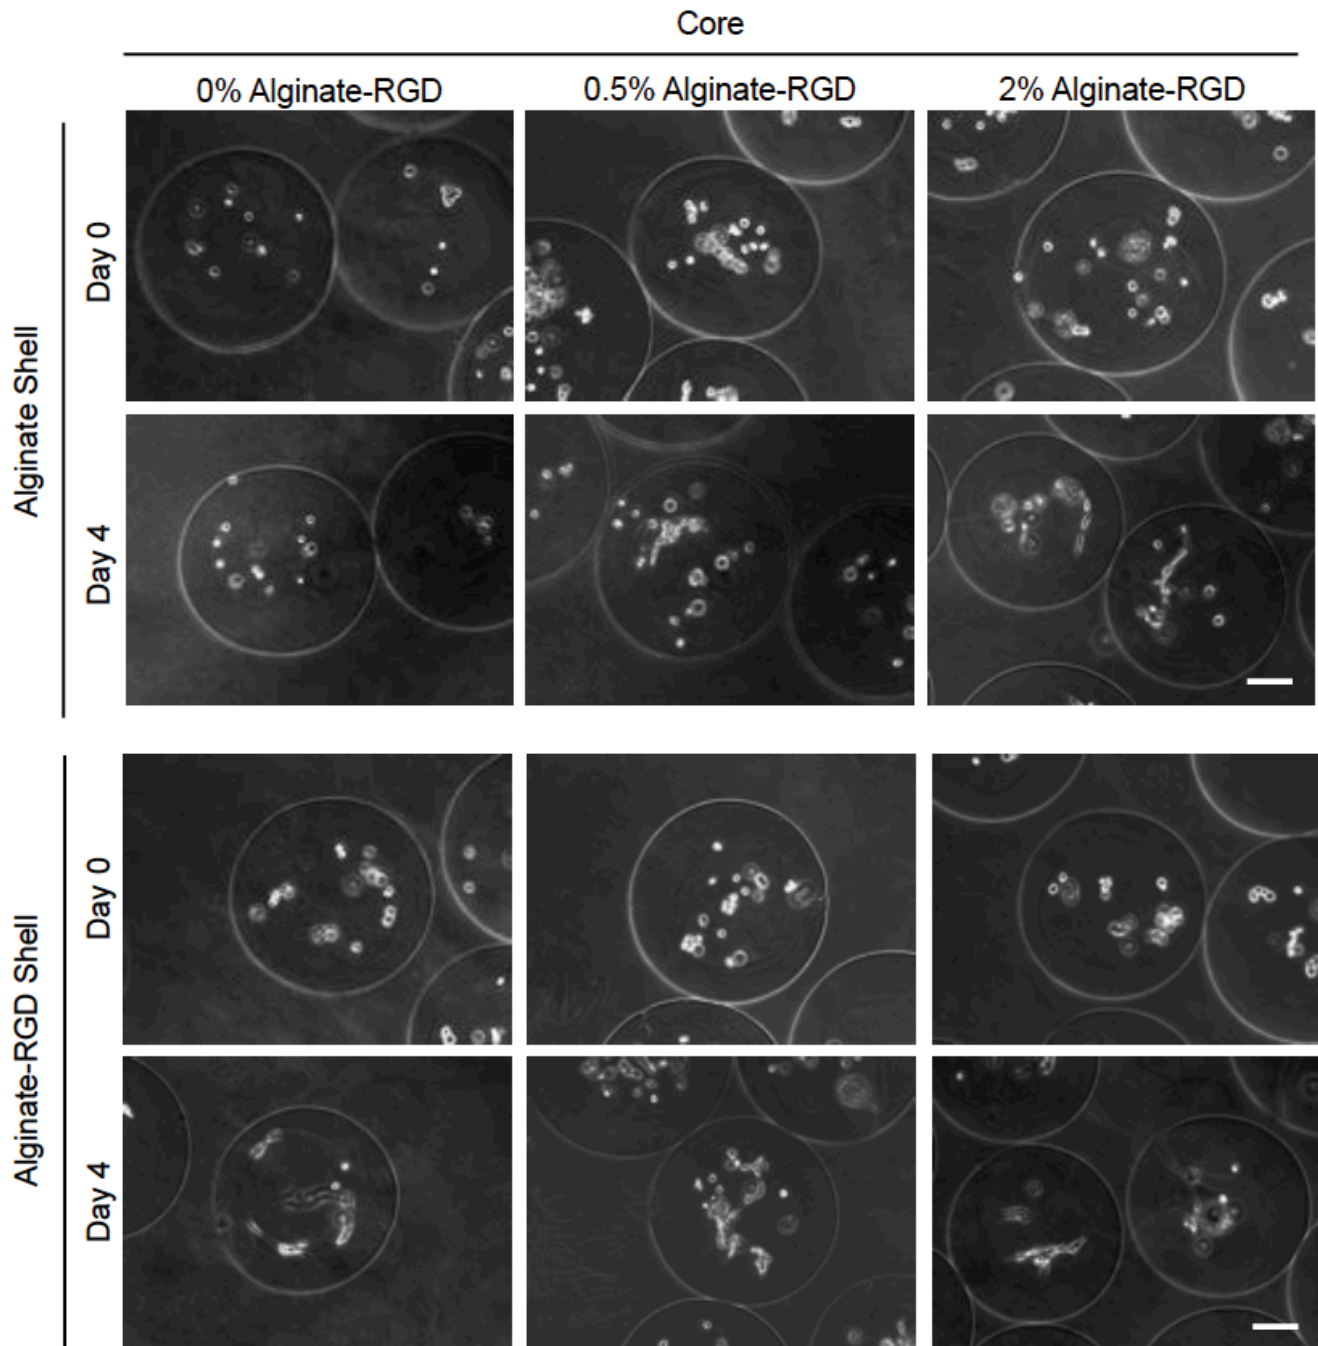

Dumbleton\_Figure S4

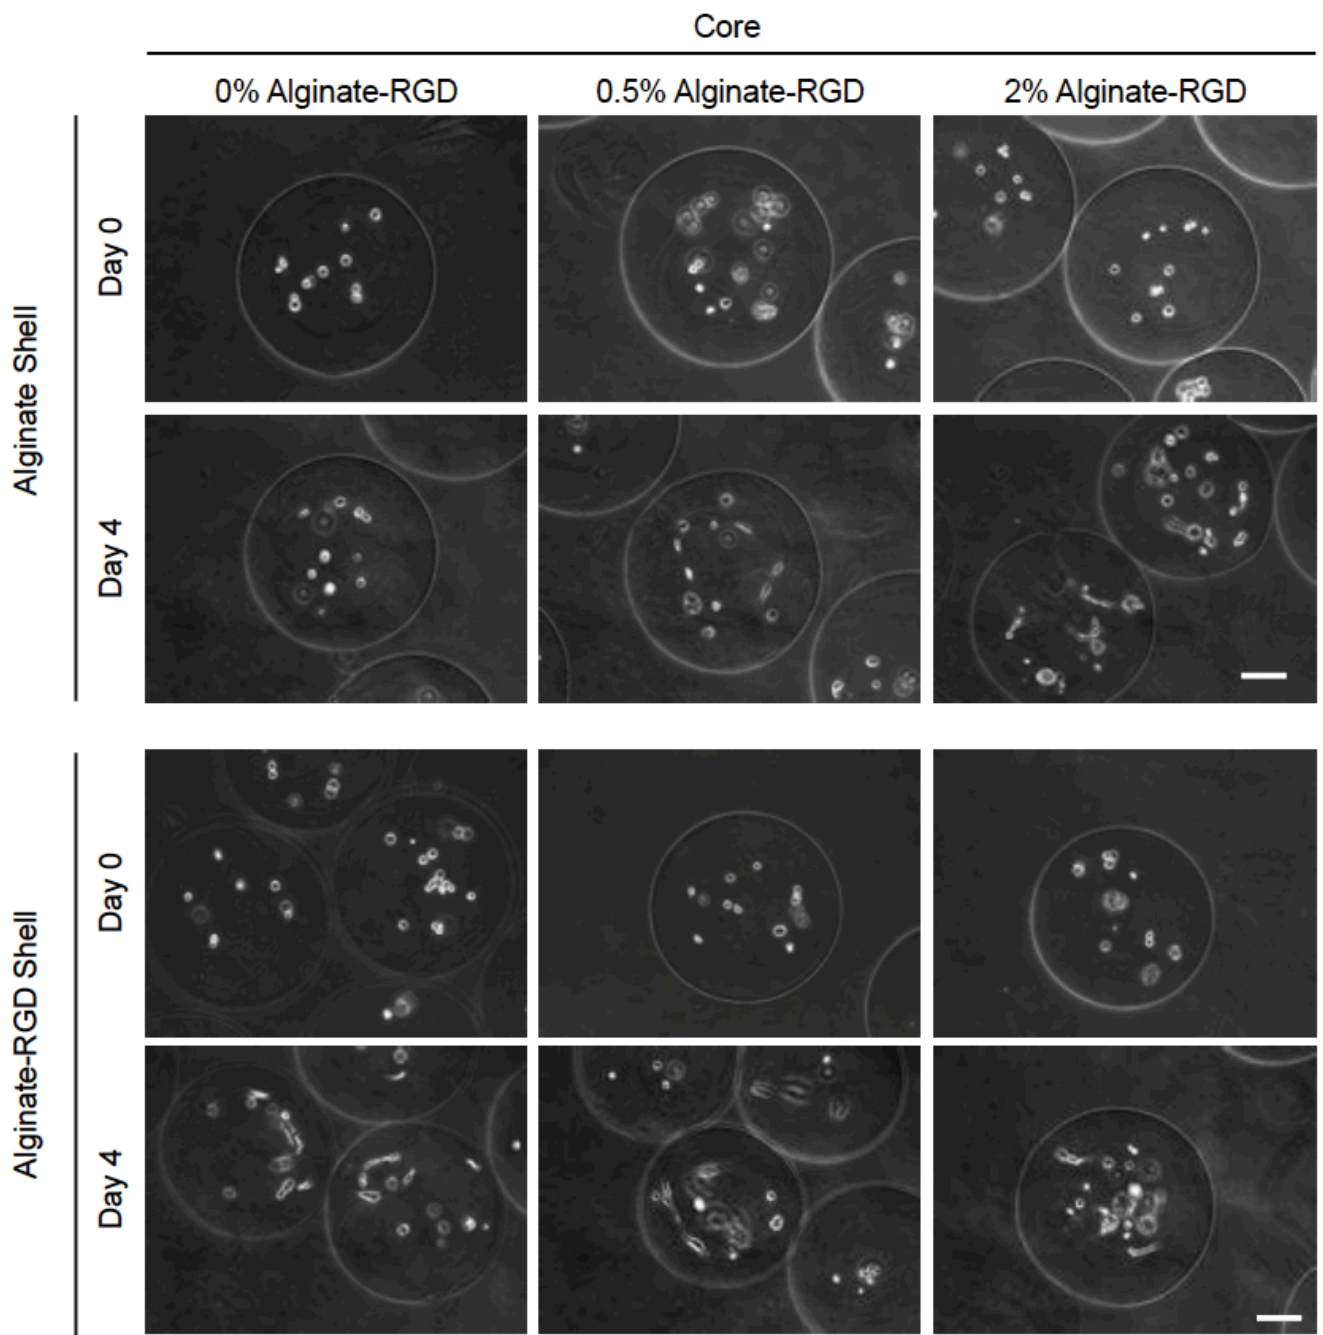

Dumbleton\_Figure S5

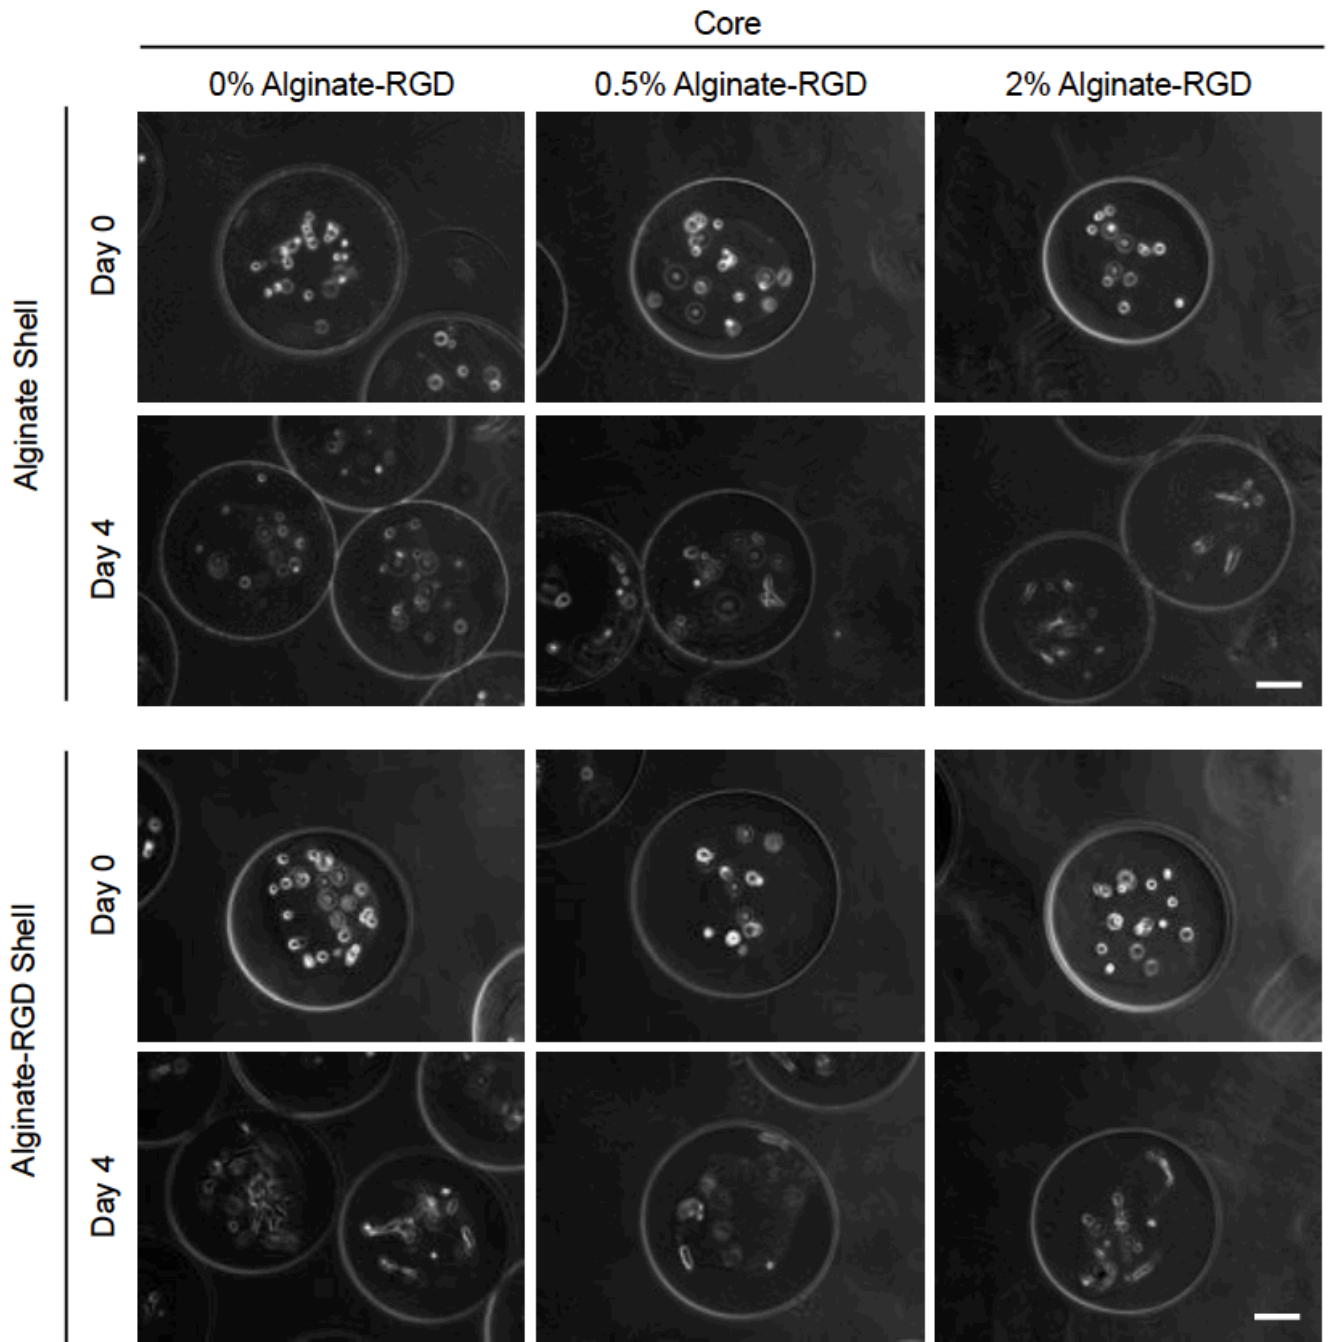

Dumbleton\_Figure S6



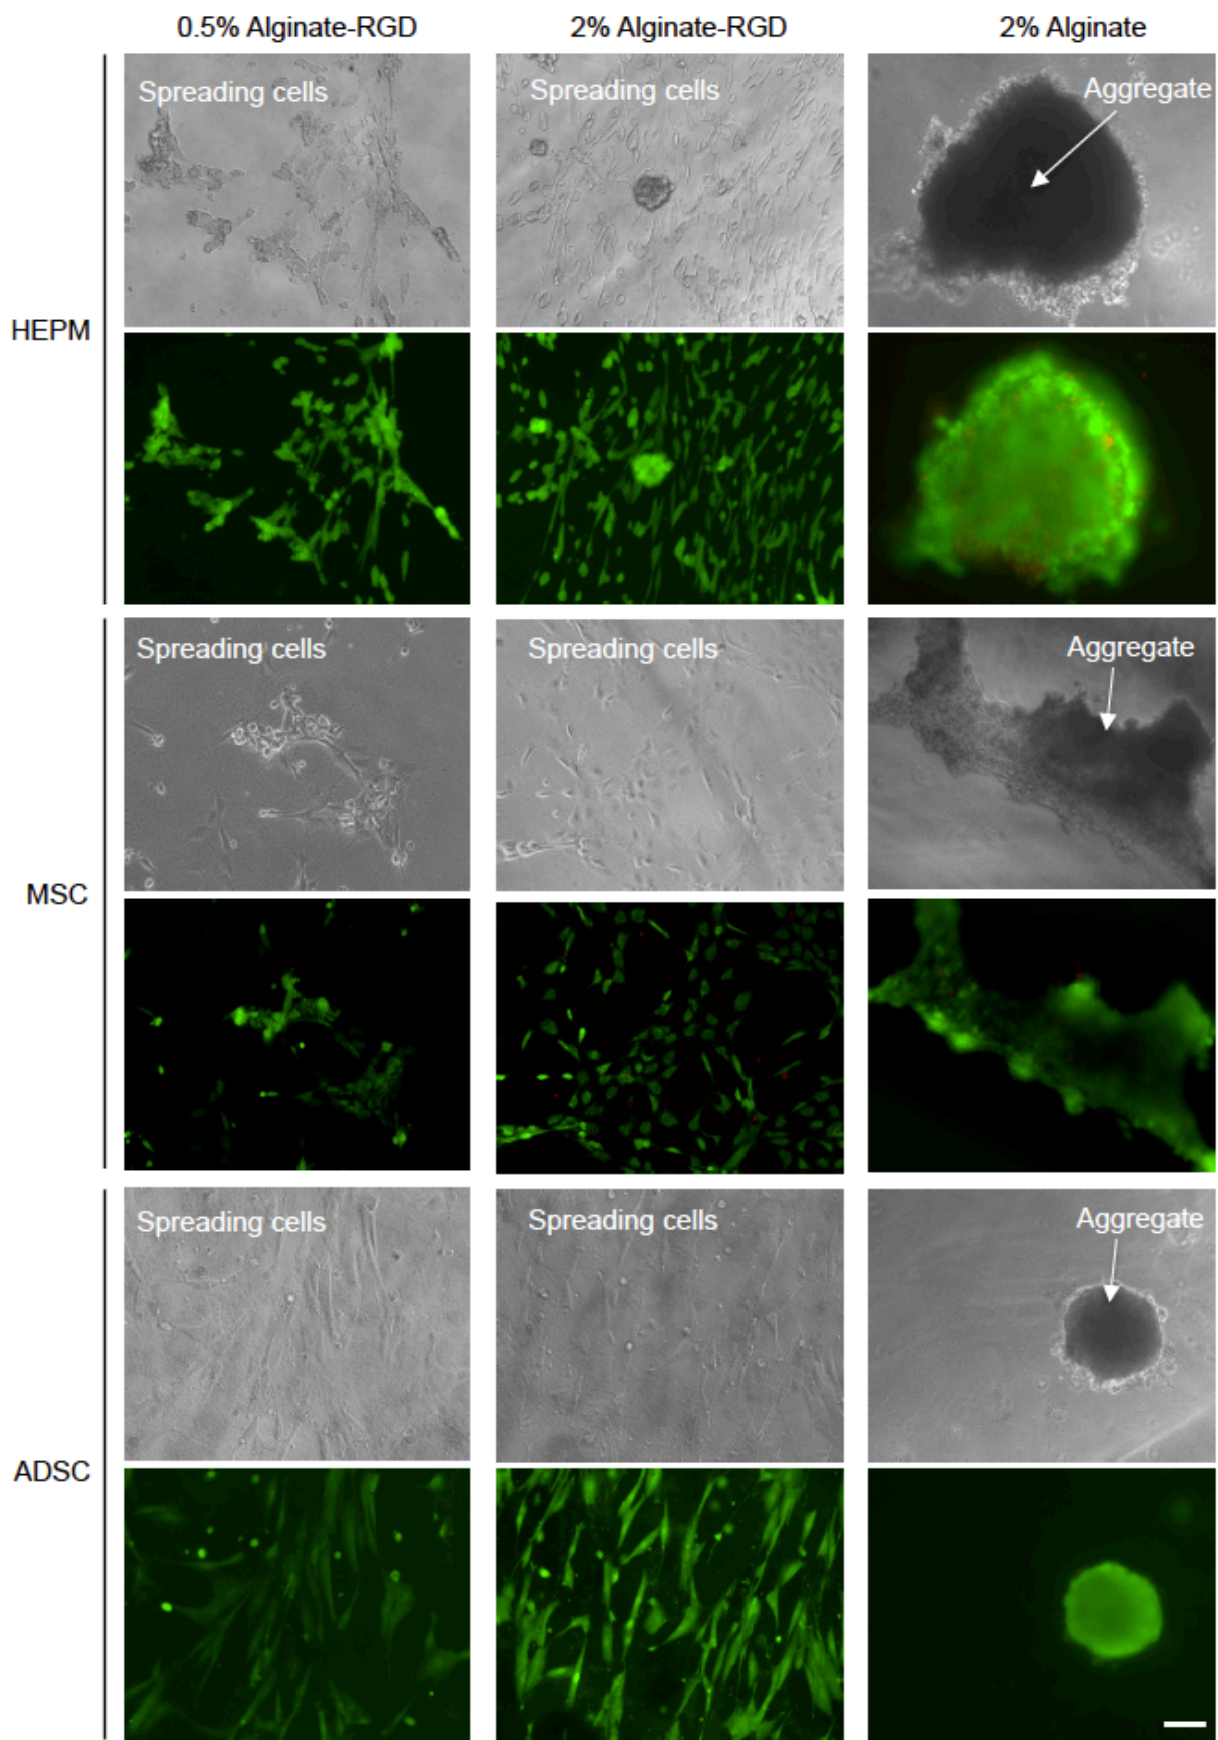

Dumbleton\_Figure S7
